# Supplementary material for: Construct Validity of the Dutch Version of the 12-Item Partners in Health Scale: Measuring Patient Self-Management Behaviour and Knowledge in Patients with Chronic Obstructive Pulmonary Disease
Source: PubMed Central journal article supplement (PMC5001637; doi:10.1371/journal.pone.0161595), 2016-08-26
Supplement: pone.0161595.s001.pdf [file pone.0161595.s001.pdf]

**S1 Table. Dutch translated 12-item Partners in Health scale (PIH(Du))**

| Item | Original Partners in Health scale                                                                                                                 | Dutch translation Partners in Health scale                                                                                                                              |
|------|---------------------------------------------------------------------------------------------------------------------------------------------------|-------------------------------------------------------------------------------------------------------------------------------------------------------------------------|
| 1    | Overall, what I know about my health condition(s) is:                                                                                             | Wat ik globaal weet over mijn gezondheidsaandoening(en) is                                                                                                              |
| 2    | Overall, what I know about the treatment, including medications of my health condition(s) is                                                      | Wat ik globaal weet over de behandeling en medicijnen van mijn aandoening(en) is                                                                                        |
| 3    | I take medications or carry out the treatments asked by my doctor or health worker                                                                | Ik neem de door de arts of zorgverlener voorgeschreven medicijnen of volg de behandeling                                                                                |
| 4    | I share in decisions made about my health condition(s) with my doctor or health worker                                                            | Beslissingen betreffende mijn gezondheidsaandoening(en) neem ik samen met mijn arts of zorgverlener                                                                     |
| 5    | I am able to deal with health professionals to get the services I need that fit with my culture, values and beliefs                               | Ik ben in staat om met gezondheidsdeskundigen te regelen dat ik de zorg krijg die ik nodig heb en die past bij mijn cultuur, waarden en overtuigingen                   |
| 6    | I attend appointments as asked by my doctor or health worker                                                                                      | Ik ga naar de door de arts of gezondheidswerker verzochte afspraken:                                                                                                    |
| 7    | I keep track of my symptoms and early warning signs (e.g. blood sugar levels, peak flow, weight, shortness of breath, pain, sleep problems, mood) | Ik houd mijn symptomen en vroege waarschuwingstekens in de gaten (bijv. bloedsuikerwaarden, piekwaarde, gewicht, kortademigheid, pijn, slaapproblemen, gemoedstoestand) |
| 8    | I take action when my early warning signs and symptoms get worse                                                                                  | Ik grijp in als de waarschuwingstekens en symptomen verergeren                                                                                                          |
| 9    | I manage the effect of my health condition(s) on <i>my physical activity</i> (i.e. walking, household tasks)                                      | Ik heb het effect van mijn gezondheidsaandoening(en) op <i>mijn fysieke activiteit</i> onder controle (d.w.z. lopen, huishoudelijke taken)                              |
| 10   | I manage the effect of my health condition(s) on <i>how I feel</i> (i.e. my emotions and spiritual wellbeing)                                     | Ik heb het effect van mijn gezondheidsaandoening(en) op <i>hoe ik me voel</i> onder controle (d.w.z. mijn emoties en geestelijk welzijn)                                |
| 11   | I manage the effect of my health condition(s) on <i>my social life</i> (i.e. how I mix with other people)                                         | Ik heb het effect van mijn gezondheidsaandoening(en) op <i>mijn sociale leven</i> onder controle (d.w.z. hoe ik met andere mensen om ga)                                |
| 12   | Overall, I manage to live a healthy life (e.g. no smoking, moderate alcohol, healthy food, regular physical activity, manage stress)              | In het algemeen lukt het mij een gezond leven te leiden (bijv. niet roken, matig alcoholgebruik, gezond eten, regelmatig bewegen, omgaan met stress)                    |

©The Partners in Health Scale is the Intellectual Property of Flinders University and is under copyright. For permission to use the PIH please contact Prof Malcolm Battersby, email: [ccm@flinders.edu.au](mailto:ccm@flinders.edu.au)
