# Supplementary material for: Construct Validity of the Dutch Version of the 12-Item Partners in Health Scale: Measuring Patient Self-Management Behaviour and Knowledge in Patients with Chronic Obstructive Pulmonary Disease
Source: PubMed Central journal article supplement (PMC5001637; doi:10.1371/journal.pone.0161595), 2016-08-26
Supplement: pone.0161595.s002.pdf [file pone.0161595.s002.pdf]

**S2 Table. Observed scores of the Dutch 12-item Partners in Health scale (PIH(Du))**

| <b>RANDnr</b> | <b>PiH1</b> | <b>PiH2</b> | <b>PiH3</b> | <b>PiH4</b> | <b>PiH5</b> | <b>PiH6</b> | <b>PiH7</b> | <b>PiH8</b> | <b>PiH9</b> | <b>PiH10</b> | <b>PiH11</b> | <b>PiH12</b> |
|---------------|-------------|-------------|-------------|-------------|-------------|-------------|-------------|-------------|-------------|--------------|--------------|--------------|
| 1             | 8           | 7           | 7           | 8           | 7           | 8           | 7           | 8           | 6           | 8            | 8            | 8            |
| 2             | 8           | 8           | 7           | 7           | 8           | 8           | 8           | 7           | 7           | 7            | 7            | 7            |
| 3             | 6           | 6           | 8           | 6           | 0           | 8           | 7           | 7           | 6           | 8            | 8            | 5            |
| 4             | 7           | 7           | 8           | 7           | 4           | 8           | 7           | 7           | 4           | 4            | 6            | 7            |
| 5             | 6           | 6           | 8           | 8           | 7           | 8           | 7           | 6           | 7           | 8            | 7            | 7            |
| 6             | 4           | 5           | 8           | 8           | 4           | 8           | 5           | 4           | 4           | 5            | 5            | 6            |
| 7             | 6           | 7           | 8           | 8           | 7           | 8           | 8           | 8           | 6           | 8            | 8            | 6            |
| 8             | 5           | 4           | 8           | 6           | 6           | 8           | 5           | 6           | 4           | 5            | 4            | 7            |
| 9             | 6           | 6           | 8           | 7           | 6           | 8           | 6           | 7           | 3           | 7            | 4            | 5            |
| 10            | 3           | 3           | 3           | 4           | 4           | 4           | 8           | 4           | 8           | 5            | 3            | 3            |
| 11            | 5           | 6           | 8           | 7           | 6           | 8           | 6           | 6           | 6           | 4            | 5            | 7            |
| 12            | 7           | 7           | 8           | 8           | 8           | 8           | 8           | 8           | 7           | 7            | 7            | 8            |
| 13            | 4           | 6           | 8           | 8           | 7           | 8           | 7           | 7           | 4           | 6            | 6            | 6            |
| 14            | 4           | 8           | 8           | 7           | 7           | 8           | 8           | 8           | 4           | 4            | 8            | 8            |
| 15            | 7           | 7           | 7           | 7           | 7           | 8           | 7           | 6           | 6           | 5            | 7            | 3            |
| 16            | 7           | 7           | 8           | 8           | 7           | 8           | 8           | 8           | 6           | 7            | 7            | 7            |
| 17            | 6           | 5           | 8           | 8           | 7           | 8           | 8           | 6           | 2           | 7            | 7            | 6            |
| 18            | 7           | 7           | 7           | 7           | 7           | 7           | 7           | 7           | 7           | 7            | 5            | 7            |
| 19            | 8           | 8           | 8           | 8           | 8           | 8           | 4           | 8           | 4           | 8            | 4            | 8            |
| 20            | 7           | 6           | 8           | 6           | 7           | 4           | 6           | 7           | 4           | 7            | 8            | 6            |
| 21            | 8           | 8           | 8           | 8           | 8           | 8           | 8           | 8           | 4           | 4            | 4            | 0            |
| 22            | 7           | 7           | 8           | 7           | 6           | 8           | 8           | 8           | 5           | 4            | 4            | 4            |
| 23            | 7           | 7           | 8           | 8           | 8           | 8           | 6           | 6           | 7           | 8            | 8            | 5            |
| 24            | 5           | 5           | 5           | 5           | 4           | 7           | 7           | 7           | 5           | 7            | 7            | 7            |
| 25            | 5           | 6           | 8           | 8           | 6           | 8           | 7           | 7           | 5           | 5            | 6            | 6            |
| 26            | 6           | 5           | 8           | 8           | 8           | 8           | 8           | 6           | 6           | 8            | 8            | 8            |
| 28            | 8           | 8           | 8           | 8           | 8           | 8           | 8           | 8           | 8           | 8            | 8            | 8            |
| 29            | 6           | 7           | 8           | 8           | 8           | 8           | 8           | 7           | 6           | 6            | 7            | 6            |
| 30            | 4           | 4           | 8           | 8           | 0           | 8           | 4           | 4           | 4           | 0            | 4            | 4            |

|    |   |   |   |   |   |   |   |   |   |   |   |   |
|----|---|---|---|---|---|---|---|---|---|---|---|---|
| 31 | 8 | 6 | 8 | 8 | 8 | 8 | 6 | 8 | 6 | 8 | 8 | 6 |
| 32 | 4 | 8 | 8 | 8 | 8 | 8 | 8 | 8 | 4 | 4 | 7 | 5 |
| 33 | 8 | 8 | 8 | 8 | 8 | 8 | 8 | 7 | 3 | 7 | 7 | 7 |
| 34 | 6 | 6 | 8 | 7 | 7 | 6 | 8 | 8 | 0 | 3 | 4 | 4 |
| 35 | 6 | 6 | 8 | 8 | 8 | 8 | 7 | 6 | 6 | 7 | 7 | 6 |
| 36 | 8 | 6 | 6 | 6 | 7 | 7 | 6 | 8 | 7 | 6 | 6 | 3 |
| 37 | 7 | 7 | 8 | 7 | 8 | 8 | 7 | 8 | 7 | 7 | 8 | 8 |
| 38 | 6 | 7 | 8 | 7 | 7 | 8 | 7 | 8 | 5 | 4 | 4 | 4 |
| 39 | 5 | 5 | 6 | 6 | 6 | 8 | 6 | 7 | 6 | 7 | 6 | 7 |
| 40 | 4 | 5 | 7 | 7 | 4 | 6 | 5 | 6 | 4 | 6 | 6 | 4 |
| 41 | 4 | 4 | 8 | 8 | 6 | 8 | 8 | 6 | 5 | 7 | 6 | 6 |
| 42 | 6 | 5 | 8 | 8 | 7 | 8 | 8 | 7 | 6 | 7 | 8 | 7 |
| 43 | 6 | 6 | 8 | 7 | 8 | 8 | 7 | 8 | 6 | 6 | 6 | 6 |
| 44 | 4 | 6 | 8 | 8 | 7 | 8 | 8 | 7 | 7 | 7 | 7 | 7 |
| 45 | 7 | 7 | 7 | 7 | 8 | 8 | 8 | 8 | 7 | 8 | 8 | 8 |
| 46 | 7 | 7 | 8 | 7 | 7 | 8 | 8 | 8 | 8 | 8 | 8 | 7 |
| 47 | 7 | 7 | 8 | 7 | 4 | 8 | 6 | 6 | 5 | 5 | 5 | 1 |
| 48 | 6 | 6 | 7 | 7 | 7 | 8 | 7 | 8 | 7 | 7 | 7 | 5 |
| 49 | 8 | 8 | 8 | 8 | 8 | 8 | 8 | 8 | 8 | 8 | 8 | 8 |
| 50 | 5 | 5 | 8 | 8 | 7 | 8 | 8 | 8 | 5 | 5 | 4 | 5 |
| 51 | 6 | 5 | 7 | 6 | 7 | 7 | 7 | 6 | 6 | 5 | 6 | 5 |
| 52 | 4 | 5 | 5 | 6 | 4 | 7 | 6 | 7 | 5 | 5 | 7 | 7 |
| 53 | 4 | 4 | 8 | 8 | 8 | 8 | 8 | 8 | 4 | 4 | 4 | 4 |
| 55 | 6 | 6 | 7 | 5 | 5 | 8 | 6 | 6 | 6 | 6 | 7 | 3 |
| 56 | 7 | 5 | 7 | 2 | 2 | 8 | 7 | 8 | 6 | 6 | 6 | 7 |
| 57 | 4 | 4 | 8 | 8 | 7 | 8 | 8 | 6 | 4 | 3 | 4 | 0 |
| 58 | 5 | 5 | 8 | 6 | 6 | 8 | 8 | 7 | 5 | 6 | 6 | 7 |
| 59 | 0 | 4 | 8 | 8 | 8 | 8 | 8 | 8 | 4 | 4 | 4 | 8 |
| 60 | 7 | 8 | 7 | 8 | 7 | 7 | 7 | 7 | 0 | 0 | 4 | 0 |
| 61 | 7 | 7 | 8 | 8 | 7 | 8 | 7 | 7 | 7 | 6 | 7 | 7 |

|    |   |   |   |   |   |   |   |   |   |   |   |   |
|----|---|---|---|---|---|---|---|---|---|---|---|---|
| 62 | 5 | 5 | 7 | 7 | 7 | 7 | 7 | 7 | 5 | 5 | 3 | 5 |
| 63 | 7 | 7 | 8 | 7 | 7 | 8 | 7 | 8 | 6 | 6 | 7 | 6 |
| 64 | 6 | 4 | 8 | 8 | 8 | 8 | 6 | 7 | 4 | 5 | 5 | 5 |
| 65 | 7 | 7 | 8 | 8 | 8 | 8 | 6 | 6 | 7 | 6 | 6 | 6 |
| 66 | 7 | 7 | 8 | 8 | 1 | 8 | 7 | 7 | 4 | 4 | 7 | 7 |
| 67 | 6 | 6 | 7 | 7 | 7 | 7 | 7 | 7 | 6 | 6 | 6 | 7 |
| 68 | 2 | 5 | 7 | 6 | 7 | 8 | 2 | 7 | 6 | 6 | 5 | 6 |
| 69 | 6 | 7 | 7 | 7 | 7 | 7 | 8 | 8 | 7 | 7 | 6 | 7 |
| 71 | 7 | 7 | 8 | 8 | 8 | 8 | 8 | 8 | 6 | 6 | 7 | 7 |
| 72 | 4 | 4 | 6 | 6 | 6 | 8 | 7 | 7 | 6 | 7 | 7 | 4 |
| 73 | 5 | 6 | 7 | 7 | 6 | 8 | 6 | 6 | 5 | 6 | 6 | 4 |
| 75 | 6 | 6 | 8 | 4 | 7 | 8 | 5 | 6 | 2 | 6 | 7 | 4 |
| 76 | 6 | 8 | 8 | 8 | 8 | 8 | 8 | 8 | 8 | 8 | 7 | 6 |
| 77 | 7 | 7 | 8 | 8 | 4 | 8 | 7 | 7 | 3 | 4 | 6 | 2 |
| 78 | 7 | 7 | 8 | 8 | 8 | 8 | 7 | 8 | 7 | 7 | 7 | 8 |
| 79 | 6 | 6 | 6 | 6 | 6 | 8 | 6 | 6 | 4 | 8 | 5 | 8 |
| 80 | 7 | 7 | 8 | 8 | 8 | 8 | 8 | 8 | 8 | 8 | 7 | 8 |
| 81 | 6 | 6 | 8 | 8 | 7 | 8 | 7 | 7 | 4 | 2 | 6 | 6 |
| 82 | 5 | 6 | 8 | 7 | 6 | 6 | 6 | 7 | 5 | 6 | 6 | 7 |
| 83 | 8 | 8 | 6 | 8 | 8 | 8 | 4 | 6 | 5 | 4 | 5 | 3 |
| 84 | 6 | 7 | 8 | 4 | 7 | 8 | 7 | 8 | 3 | 6 | 6 | 3 |
| 85 | 6 | 6 | 7 | 7 | 7 | 8 | 7 | 8 | 6 | 6 | 6 | 7 |
| 86 | 8 | 4 | 6 | 8 | 8 | 6 | 0 | 8 | 0 | 7 | 0 | 0 |
| 87 | 7 | 7 | 8 | 8 | 8 | 8 | 7 | 7 | 6 | 7 | 6 | 7 |
| 90 | 8 | 7 | 8 | 8 | 7 | 8 | 7 | 8 | 8 | 8 | 8 | 8 |
| 91 | 4 | 4 | 8 | 8 | 8 | 8 | 6 | 7 | 3 | 3 | 6 | 7 |
| 92 | 6 | 5 | 8 | 8 | 7 | 8 | 6 | 7 | 5 | 5 | 6 | 3 |
| 93 | 5 | 4 | 8 | 8 | 8 | 8 | 8 | 8 | 5 | 8 | 8 | 8 |
| 94 | 6 | 6 | 8 | 8 | 6 | 8 | 7 | 7 | 6 | 6 | 7 | 5 |
| 95 | 6 | 6 | 8 | 8 | 8 | 8 | 8 | 8 | 7 | 8 | 8 | 8 |

|     |   |   |   |   |   |   |   |   |   |   |   |   |
|-----|---|---|---|---|---|---|---|---|---|---|---|---|
| 96  | 6 | 6 | 8 | 7 | 7 | 8 | 7 | 5 | 0 | 6 | 7 | 7 |
| 97  | 7 | 7 | 7 | 7 | 8 | 5 | 7 | 7 | 6 | 8 | 7 | 7 |
| 98  | 6 | 6 | 7 | 4 | 5 | 8 | 3 | 3 | 5 | 4 | 5 | 4 |
| 99  | 6 | 6 | 7 | 6 | 7 | 8 | 7 | 7 | 6 | 4 | 4 | 6 |
| 100 | 6 | 7 | 8 | 8 | 8 | 8 | 7 | 8 | 7 | 7 | 8 | 7 |
| 101 | 8 | 4 | 8 | 8 | 8 | 8 | 8 | 8 | 4 | 4 | 8 | 4 |
| 102 | 4 | 0 | 8 | 0 | 0 | 8 | 8 | 8 | 8 | 4 | 4 | 4 |
| 103 | 6 | 7 | 7 | 7 | 7 | 8 | 7 | 7 | 7 | 7 | 7 | 5 |
| 104 | 6 | 6 | 7 | 4 | 1 | 8 | 5 | 7 | 7 | 6 | 7 | 7 |
| 105 | 6 | 7 | 7 | 7 | 8 | 8 | 7 | 7 | 7 | 6 | 6 | 5 |
| 106 | 4 | 0 | 8 | 7 | 7 | 8 | 7 | 7 | 4 | 3 | 4 | 4 |
| 107 | 8 | 8 | 8 | 8 | 8 | 8 | 8 | 4 | 4 | 4 | 8 | 4 |
| 109 | 6 | 6 | 7 | 7 | 8 | 8 | 8 | 8 | 8 | 8 | 7 | 8 |
| 110 | 7 | 7 | 8 | 8 | 8 | 8 | 8 | 8 | 7 | 7 | 7 | 8 |
| 112 | 8 | 6 | 8 | 8 | 8 | 8 | 8 | 8 | 8 | 7 | 8 | 7 |
| 114 | 5 | 6 | 8 | 8 | 8 | 8 | 6 | 8 | 5 | 5 | 7 | 5 |
| 115 | 8 | 8 | 8 | 8 | 8 | 7 | 8 | 8 | 8 | 8 | 8 | 8 |
| 116 | 6 | 5 | 7 | 7 | 7 | 7 | 6 | 7 | 5 | 6 | 6 | 4 |
| 117 | 6 | 6 | 6 | 7 | 7 | 7 | 6 | 7 | 7 | 5 | 7 | 6 |
| 118 | 5 | 5 | 8 | 8 | 7 | 8 | 5 | 5 | 3 | 3 | 3 | 4 |
| 119 | 7 | 8 | 8 | 8 | 8 | 8 | 8 | 8 | 7 | 8 | 8 | 8 |
| 121 | 7 | 5 | 7 | 6 | 4 | 8 | 6 | 4 | 5 | 3 | 5 | 6 |
| 122 | 5 | 6 | 8 | 8 | 7 | 8 | 8 | 7 | 7 | 6 | 7 | 7 |
| 122 | 7 | 7 | 8 | 8 | 7 | 8 | 8 | 8 | 1 | 1 | 1 | 1 |
| 123 | 5 | 6 | 8 | 8 | 7 | 8 | 6 | 7 | 6 | 6 | 7 | 5 |
| 124 | 5 | 4 | 8 | 8 | 4 | 8 | 6 | 6 | 4 | 4 | 4 | 4 |
| 125 | 6 | 6 | 7 | 7 | 7 | 7 | 7 | 7 | 7 | 7 | 7 | 5 |
| 127 | 6 | 6 | 8 | 8 | 8 | 8 | 8 | 8 | 7 | 7 | 8 | 7 |
| 128 | 5 | 6 | 7 | 6 | 7 | 8 | 6 | 7 | 7 | 7 | 7 | 2 |

RANDnr = randomisation number (person index), n=118 cases.

Note: observed item scores before collapsing categories
